# Supplementary material for: The protein kinase MBK-1 contributes to lifespan extension in daf-2 mutant and germline-deficient Caenorhabditis elegans
Source: publisher site journal article supplement (doi:10.18632/aging.101244), 2017-05-25
Supplement: Supplementary file 1 [file aging-v9i5-101244-supplementary-material-SD1.pdf]

## SUPPLEMENTARY MATERIAL

**Supplementary Table 1. List of strains used in this study.**

| Strain | genotype                                                                                               | comment                                                              |
|--------|--------------------------------------------------------------------------------------------------------|----------------------------------------------------------------------|
| N2E    |                                                                                                        | Wild-type                                                            |
| CF3942 | <i>glp-1(e2144ts) III</i>                                                                              | <i>glp-1(e2144ts)</i> from CF1903 [21], outcrossed 12x to N2E        |
| CF3943 | <i>muIs84[Psod-3::gfp]</i>                                                                             | <i>muIs84</i> from CF1553 [38] outcrossed 12x                        |
| CF3949 | <i>glp-1(e2144ts) III; muIs84[Psod-3::gfp]</i>                                                         |                                                                      |
| CF4339 | <i>daf-2;(e1370) III; muIs84[Psod-3::gfp]</i>                                                          |                                                                      |
| CF4054 | <i>daf-16(mu86) I</i>                                                                                  | <i>daf-16(mu86)</i> from CF1037 [18], outcrossed 12x to N2E          |
| CF4087 | <i>daf-2(e1370) III</i>                                                                                | <i>daf-16(mu86)</i> from CF1041 [18], outcrossed 12x                 |
| CF4096 | <i>daf-16(mu86) I; muIs194[Pges-1::ha::gfp::daf-16 + Podr-1::rfp]</i>                                  | <i>muIs194</i> from CF3628: <i>daf-16(mu86) I; muIs194</i>           |
| CF4117 | <i>zcls18[Pges-1::gfp(cyt)]</i>                                                                        | Strain SJ4144 (Ron lab/CGC) outcrossed 6x                            |
| CF4164 | <i>mbk-1(pk1389) X</i>                                                                                 | <i>mbk-1(pk1389)</i> from EK228 [26] (Kandel lab /CGC) outcrossed 6x |
| CF4165 | <i>glp-1(e2144ts) III; mbk-1(pk1389) X</i>                                                             |                                                                      |
| CF4166 | <i>daf-2(e1370) III; mbk-1(pk1389) X</i>                                                               |                                                                      |
| CF4167 | <i>daf-16(mu86) I; muIs145[Pges-1::gfp::daf-16 + Podr-1::rfp]</i>                                      | <i>muIs145</i> is the integrated version of muEx268 [38]             |
| CF4168 | <i>daf-16(mu86) I; glp-1(e2144ts) III; muIs145[Pges-1::gfp::daf-16 + Podr-1::rfp]</i>                  |                                                                      |
| CF4169 | <i>daf-16(mu86) I; daf-2(e1370) III; muIs145[Pges-1::gfp::daf-16 + Podr-1::rfp]</i>                    |                                                                      |
| HMT029 | <i>daf-16(mu86) I; mbk-1(pk1389) X; muIs145[Pges-1::gfp::daf-16 + Podr-1::rfp]</i>                     |                                                                      |
| HMT030 | <i>daf-16(mu86) I; glp-1(e2144ts) III; mbk-1(pk1389) X; muIs145[Pges-1::gfp::daf-16 + Podr-1::rfp]</i> |                                                                      |
| HMT031 | <i>daf-16(mu86) I; daf-2(e1370) III; mbk-1(pk1389) X; muIs145[Pges-1::gfp::daf-16 + Podr-1::rfp]</i>   |                                                                      |
| CF4173 | <i>hpk-1(pk1393) X</i>                                                                                 | <i>hpk-1(pk1393)</i> from EK273 [26] (Kandel lab/CGC) outcrossed 6x  |
| CF4185 | <i>glp-1(e2144ts) III; hpk-1(pk1393) X</i>                                                             |                                                                      |
| HMT001 | <i>daf-2(e1370) III; hpk-1(pk1393) X</i>                                                               | Very low progeny, reported to be synthetic lethal [34]               |
| CF4183 | <i>hpk-1(pk1393) X; muIs84[Psod-3::gfp]</i>                                                            |                                                                      |
| HMT002 | <i>glp-1(e2144ts) III; hpk-1(pk1393) X; muIs84[Psod-3::gfp]</i>                                        |                                                                      |
| CF4184 | <i>mbk-1(pk1389) X; muIs84[Psod-3::gfp]</i>                                                            |                                                                      |
| HMT003 | <i>glp-1(e2144ts) III; mbk-1(pk1389) X; muIs84[Psod-3::gfp]</i>                                        |                                                                      |
| HMT004 | <i>daf-2(e1370) III; mbk-1(pk1389) X; muIs84[Psod-3::gfp]</i>                                          |                                                                      |

**Supplementary Table 2. List of qPCR primers used in this study.**

| <b>primer name</b> | <b>primer sequence 5'--&gt;3'</b>  |
|--------------------|------------------------------------|
| cdc-42_RT_F        | TCA GCG TTG ACG CAG AAG            |
| cdc-42_RT_R        | CAT GGA GAC AAG GAA GAC GTT        |
| tba-1_RT_F         | TCC ACT GAT CTC TGC TGA CAA        |
| tba-1_RT_R         | TGG ATC GCA CTT CAC CAT T          |
| Y45F10D.4_RT_F     | AAG CGT CGG AAC AGG AAT C          |
| Y45F10D.4_RT_R     | TTT TTC CGT TAT CGT CGA CTC        |
| daf-16_RT_F        | TAC GAA TGG ATG GTC CAG AA         |
| daf-16_RT_R        | TCG CAT GAA ACG AGA ATGA A         |
| sod-3_RT_F         | AAA GGA GCT GAT GGA CAC TAT TAA GC |
| sod-3_RT_R         | AAG TTA TCC AGG GAA CCG AAG TC     |
| aat-1_RT_F         | CCC AAA ACG AAA CCT TCC ACT CGC    |
| aat-1_RT_R         | TGA AAT TGC TGT GTA GAG AGC CAC    |
| dod-8_RT_F         | ACA GGA TGT CTT CAA AAG GAA TAT GG |
| dod-8_RT_R         | TTG CTG GGG TGA TAG CTT GG         |
| gpd-2_RT_F         | AAG GCC AAC GCT CAC TTG AA         |
| gpd-2_RT_R         | GGT TGA CTC CGA CGA CGA AC         |
| F52H3.5_RT_F       | GAA GTT TAC AAA AGC ACT CGA AG     |
| F52H3.5_RT_R       | GGT TTA TTT TGA AGT CGG TAT GC     |
| K07B1.4_RT_F       | GGT CTT CTT CCA TTC AGA AAA CC     |
| K07B1.4_RT_R       | TGT ATG TCT GAT GAA GTG TGT CG     |
| nnt-1_RT_F         | CAG TAG AAA CTG CTG ACA TGC TTC    |
| nnt-1_RT_R         | GAG CGA TGG GAT ATT GTG CCT GAG    |
| T21D12.9_RT_F      | CAT CTA AAT CTA TCA ACT AAT AGA G  |
| T21D12.9_RT_R      | GTA GGA CAG GTC CAA AAC TTC CAA G  |

**Supplementary Table 3. Effect of *mbk-1* loss on *Psod-3::gfp*-expression in wild-type and germline-deficient *C. elegans*. Related to Figure 3C.**

| Experiment | Strain                    | Worm number | Fold-change expression relative to wt |      |      | Fold-change expression relative to <i>gfp-1(-)</i> |      |      | P-value |
|------------|---------------------------|-------------|---------------------------------------|------|------|----------------------------------------------------|------|------|---------|
|            |                           |             | Mean                                  | SD   | SEM  | Mean                                               | SD   | SEM  |         |
| #1         | wt                        | 24          | 1.00                                  | 0.15 | 0.03 | 0.38                                               | 0.06 | 0.01 | >0.05   |
|            | <i>mbk-1(-)</i>           | 24          | 0.91                                  | 0.16 | 0.03 | 0.34                                               | 0.06 | 0.01 |         |
|            | <i>gfp-1(-)</i>           | 22          | 2.65                                  | 1.07 | 0.23 | 1.00                                               | 0.40 | 0.09 |         |
|            | <i>gfp-1(-); mbk-1(-)</i> | 9           | 0.99                                  | 0.22 | 0.07 | 0.37                                               | 0.08 | 0.03 |         |
| #2         | wt                        | 24          | 1.00                                  | 0.20 | 0.04 | 0.47                                               | 0.09 | 0.02 | >0.05   |
|            | <i>mbk-1(-)</i>           | 20          | 0.82                                  | 0.32 | 0.07 | 0.39                                               | 0.15 | 0.03 |         |
|            | <i>gfp-1(-)</i>           | 15          | 2.12                                  | 0.71 | 0.18 | 1.00                                               | 0.34 | 0.09 |         |
|            | <i>gfp-1(-); mbk-1(-)</i> | 10          | 0.87                                  | 0.22 | 0.07 | 0.41                                               | 0.10 | 0.03 |         |
| #3         | wt                        | 9           | 1.00                                  | 0.08 | 0.03 | 0.59                                               | 0.05 | 0.02 | >0.05   |
|            | <i>mbk-1(-)</i>           | 9           | 0.83                                  | 0.10 | 0.03 | 0.49                                               | 0.06 | 0.02 |         |
|            | <i>gfp-1(-)</i>           | 8           | 1.69                                  | 0.45 | 0.16 | 1.00                                               | 0.27 | 0.09 |         |
|            | <i>gfp-1(-); mbk-1(-)</i> | 9           | 0.97                                  | 0.25 | 0.08 | 0.58                                               | 0.15 | 0.05 |         |

The effect of the *mbk-1* loss of function mutation *mbk-1(pk1389)* on the expression of a *Psod-3::gfp* reporter gene (*mul84*) relative to *mbk-1(+)* animals was examined in wild-type and germline-less, *gfp-1(-)* [*gfp-1(e2144ts)*] worms. Fluorescence images were quantified, corrected for background, and fold-changes in reporter gene expression were calculated relative to wild-type and *gfp-1(-)* animals. Statistical significance was determined by two-way ANOVA with Bonferroni post tests. Experiment #3 is shown in Figure 3C.

**Supplementary Table 4. Effect of *hpk-1* loss on *Psod-3::gfp*-expression in wild-type and germline-deficient *C. elegans*. Related to Supplementary Figure S2A.**

| Experiment | Strain                    | Worm number | Fold-change expression relative to wt |      |      | Fold-change expression relative to <i>gfp-1(-)</i> |      |      | P-value |
|------------|---------------------------|-------------|---------------------------------------|------|------|----------------------------------------------------|------|------|---------|
|            |                           |             | Mean                                  | SD   | SEM  | Mean                                               | SD   | SEM  |         |
| #1         | wt                        | 24          | 1.00                                  | 0.15 | 0.03 | 0.38                                               | 0.06 | 0.01 | <0.01   |
|            | <i>hpk-1(-)</i>           | 23          | 1.65                                  | 0.26 | 0.05 | 0.62                                               | 0.10 | 0.02 |         |
|            | <i>gfp-1(-)</i>           | 22          | 2.65                                  | 1.07 | 0.23 | 1.00                                               | 0.40 | 0.09 |         |
|            | <i>gfp-1(-); hpk-1(-)</i> | 22          | 2.60                                  | 0.59 | 0.13 | 0.98                                               | 0.22 | 0.05 |         |
| #2         | wt                        | 24          | 1.00                                  | 0.20 | 0.04 | 0.47                                               | 0.09 | 0.02 | >0.05   |
|            | <i>hpk-1(-)</i>           | 14          | 1.27                                  | 0.43 | 0.12 | 0.60                                               | 0.21 | 0.05 |         |
|            | <i>gfp-1(-)</i>           | 15          | 2.12                                  | 0.71 | 0.18 | 1.00                                               | 0.34 | 0.09 |         |
|            | <i>gfp-1(-); hpk-1(-)</i> | 3           | 1.71                                  | 0.65 | 0.37 | 0.81                                               | 0.31 | 0.18 |         |
| #3         | wt                        | 9           | 1.00                                  | 0.08 | 0.03 | 0.59                                               | 0.05 | 0.02 | >0.05   |
|            | <i>hpk-1(-)</i>           | 25          | 1.14                                  | 0.20 | 0.04 | 0.67                                               | 0.12 | 0.02 |         |
|            | <i>gfp-1(-)</i>           | 8           | 1.69                                  | 0.45 | 0.16 | 1.00                                               | 0.27 | 0.09 |         |
|            | <i>gfp-1(-); hpk-1(-)</i> | 17          | 1.30                                  | 0.14 | 0.03 | 0.77                                               | 0.08 | 0.02 |         |

The effect of the *hpk-1* loss of function mutation *hpk-1(pk1393)* on the expression of a *Psod-3::gfp* reporter gene (*mul84*) relative to *hpk-1(+)* animals was examined in wild-type and germline-less, *gfp-1(-)* [*gfp-1(e2144ts)*] worms. Fluorescence images were quantified, corrected for background, and fold-changes in reporter gene expression were calculated relative to wild-type and *gfp-1(-)* animals. Statistical significance was determined by two-way ANOVA with Bonferroni post tests. Experiment #3 is shown in Supplementary Figure S2A. Note: In Experiment #3, 3 images were taken for *hpk-1(-)* and 2 images for *gfp-1; hpk-1(-)*.

**Supplementary Table 5. Effect of *mbk-2* knockdown on *Psod-3::gfp*-expression in wild-type and germline-deficient *C. elegans*. Related to Supplementary Figure S2B.**

| Experiment | Strain/RNAi                    | Worm number | Fold-change expression relative to wt |      |      | Fold-change expression relative to <i>glp-1</i> |      |      | P-value |
|------------|--------------------------------|-------------|---------------------------------------|------|------|-------------------------------------------------|------|------|---------|
|            |                                |             | Mean                                  | SD   | SEM  | Mean                                            | SD   | SEM  |         |
| #1         | wt/control                     | 7           | 1.00                                  | 0.12 | 0.04 | 0.47                                            | 0.06 | 0.02 | >0.05   |
|            | wt/ <i>mbk-2</i>               | 10          | 1.35                                  | 0.27 | 0.08 | 0.64                                            | 0.13 | 0.04 |         |
|            | <i>glp-1(-)</i> /control       | 8           | 2.12                                  | 0.76 | 0.27 | 1.00                                            | 0.36 | 0.13 | <0.01   |
|            | <i>glp-1(-)</i> / <i>mbk-2</i> | 10          | 2.90                                  | 0.65 | 0.21 | 1.37                                            | 0.31 | 0.10 |         |
| #2         | wt/control                     | 9           | 1.00                                  | 0.16 | 0.05 | 0.51                                            | 0.08 | 0.03 | <0.001  |
|            | wt/ <i>mbk-2</i>               | 9           | 1.78                                  | 0.22 | 0.07 | 0.91                                            | 0.11 | 0.04 |         |
|            | <i>glp-1(-)</i> /control       | 10          | 1.96                                  | 0.51 | 0.16 | 1.00                                            | 0.26 | 0.08 | <0.001  |
|            | <i>glp-1(-)</i> / <i>mbk-2</i> | 10          | 5.10                                  | 0.57 | 0.18 | 2.60                                            | 0.29 | 0.09 |         |
| #3         | wt/control                     | 10          | 1.00                                  | 0.09 | 0.03 | 0.58                                            | 0.05 | 0.02 | >0.05   |
|            | wt/ <i>mbk-2</i>               | 10          | 1.22                                  | 0.19 | 0.06 | 0.71                                            | 0.11 | 0.04 |         |
|            | <i>glp-1(-)</i> /control       | 10          | 1.72                                  | 0.30 | 0.10 | 1.00                                            | 0.18 | 0.06 | <0.01   |
|            | <i>glp-1(-)</i> / <i>mbk-2</i> | 10          | 2.30                                  | 0.69 | 0.22 | 1.34                                            | 0.40 | 0.13 |         |
| #4         | wt/control                     | 16          | 1.00                                  | 0.06 | 0.01 | 0.60                                            | 0.03 | 0.01 | >0.05   |
|            | wt/ <i>mbk-2</i>               | 11          | 1.06                                  | 0.07 | 0.02 | 0.64                                            | 0.04 | 0.01 |         |
|            | <i>glp-1(-)</i> /control       | 20          | 1.65                                  | 0.29 | 0.06 | 1.00                                            | 0.17 | 0.04 | <0.01   |
|            | <i>glp-1(-)</i> / <i>mbk-2</i> | 8           | 2.02                                  | 0.53 | 0.19 | 1.22                                            | 0.32 | 0.11 |         |
| #5         | wt/control                     | 10          | 1.00                                  | 0.19 | 0.06 | 0.42                                            | 0.08 | 0.03 | <0.05   |
|            | wt/ <i>mbk-2</i>               | 10          | 1.79                                  | 0.69 | 0.22 | 0.75                                            | 0.29 | 0.09 |         |
|            | <i>glp-1(-)</i> /control       | 10          | 2.39                                  | 0.35 | 0.11 | 1.00                                            | 0.15 | 0.05 | <0.001  |
|            | <i>glp-1(-)</i> / <i>mbk-2</i> | 10          | 4.01                                  | 1.14 | 0.36 | 1.68                                            | 0.48 | 0.15 |         |

The effect of *mbk-2* knockdown on the expression of a *Psod-3::gfp* reporter gene (*muls84*) relative to control-RNAi (vector L4440) treated animals was examined in wild-type and germline-less, *glp-1(-)* [*glp-1(e2144ts)*] worms. Fluorescence images were quantified, corrected for background, and fold-changes in reporter gene expression were calculated relative to wild-type and *glp-1(-)* animals. Statistical significance was determined by two-way ANOVA with Bonferroni post tests. Experiment #5 is shown in Supplementary Figure S2B.

|        |     |                                     |       |            |        |         |          |       |               |                   |     |    |   |    |     |   |     |   |   |   |   |   |   |   |   |   |   |   |   |   |   |   |       |   |   |      |   |   |   |     |     |     |   |   |   |     |  |
|--------|-----|-------------------------------------|-------|------------|--------|---------|----------|-------|---------------|-------------------|-----|----|---|----|-----|---|-----|---|---|---|---|---|---|---|---|---|---|---|---|---|---|---|-------|---|---|------|---|---|---|-----|-----|-----|---|---|---|-----|--|
| DAF-16 | 242 | TIETTTKAQLEKSRRGAKKRIKERALMGSLH     | S     | TL-NGNSIAG | S      | IQTI    | SHDL     | YDDDD | SMQGA         | 300               |     |    |   |    |     |   |     |   |   |   |   |   |   |   |   |   |   |   |   |   |   |   |       |   |   |      |   |   |   |     |     |     |   |   |   |     |  |
| mFOXO1 | 254 | -MDNNSKFAKSRGRAAKKKASLQSGQEGPGD     | S     | P          | GSQF   | SKWPAS  | P        | GS    | HSND          | 303               |     |    |   |    |     |   |     |   |   |   |   |   |   |   |   |   |   |   |   |   |   |   |       |   |   |      |   |   |   |     |     |     |   |   |   |     |  |
| hFOXO1 | 257 | -MDNNSKFAKSRGRAAKKKASLQSGQEGAGD     | S     | P          | GSQF   | SKWPAS  | P        | GS    | HSND          | 306               |     |    |   |    |     |   |     |   |   |   |   |   |   |   |   |   |   |   |   |   |   |   |       |   |   |      |   |   |   |     |     |     |   |   |   |     |  |
| hFOXO3 | 254 | -MDNSNKYTKSRGRAAKKKAALQTAPESADD     | S     | P          | -SQL   | SKWPG   | S        | P     | TSRSSD        | 302               |     |    |   |    |     |   |     |   |   |   |   |   |   |   |   |   |   |   |   |   |   |   |       |   |   |      |   |   |   |     |     |     |   |   |   |     |  |
|        |     | : : : : *                           |       | .. *       |        | .. **   |          | : . . | . * :         |                   |     |    |   |    |     |   |     |   |   |   |   |   |   |   |   |   |   |   |   |   |   |   |       |   |   |      |   |   |   |     |     |     |   |   |   |     |  |
|        |     |                                     |       |            |        |         |          |       |               |                   |     |    |   |    |     |   |     |   |   |   |   |   |   |   |   |   |   |   |   |   |   |   |       |   |   |      |   |   |   |     |     |     |   |   |   |     |  |
| DAF-16 | 301 | FDNVPSFRPRTQSNLSIPGSSSRV            | S     | P          | AIGSD  | IYDDLE  | -----    | FPSW  | VE            | 345               |     |    |   |    |     |   |     |   |   |   |   |   |   |   |   |   |   |   |   |   |   |   |       |   |   |      |   |   |   |     |     |     |   |   |   |     |  |
| mFOXO1 | 304 | FD-NWSTFRPRTSSNASTI--SGRL           | S     | P          | IMTE   | QDD--   | LGDG--   | DVHSL | VYPPSAAK      | 351               |     |    |   |    |     |   |     |   |   |   |   |   |   |   |   |   |   |   |   |   |   |   |       |   |   |      |   |   |   |     |     |     |   |   |   |     |  |
| hFOXO1 | 307 | FD-NWSTFRPRTSSNASTI--SGRL           | S     | P          | IMTE   | QDD--   | LGE      | GD--  | DVHSMVYPPSAAK | 354               |     |    |   |    |     |   |     |   |   |   |   |   |   |   |   |   |   |   |   |   |   |   |       |   |   |      |   |   |   |     |     |     |   |   |   |     |  |
| hFOXO3 | 303 | LD-AWTDFRSRTNSNASTV--SGRL           | S     | P          | IMASTE | LDEVQDD | DAPLSP   | MLYSS | SASLSPSVS     | 359               |     |    |   |    |     |   |     |   |   |   |   |   |   |   |   |   |   |   |   |   |   |   |       |   |   |      |   |   |   |     |     |     |   |   |   |     |  |
|        |     | : * :                               |       | ** **      | . * *  | *       | : * : ** | :     | .             |                   |     |    |   |    |     |   |     |   |   |   |   |   |   |   |   |   |   |   |   |   |   |   |       |   |   |      |   |   |   |     |     |     |   |   |   |     |  |
|        |     |                                     |       |            |        |         |          |       |               |                   |     |    |   |    |     |   |     |   |   |   |   |   |   |   |   |   |   |   |   |   |   |   |       |   |   |      |   |   |   |     |     |     |   |   |   |     |  |
| DAF-16 | 346 | -----SVP                            | AI    | -----      | PSD    | IVDR    | T        | DQ    | -----         | MRIDATTHIGGVQIKQE | 377 |    |   |    |     |   |     |   |   |   |   |   |   |   |   |   |   |   |   |   |   |   |       |   |   |      |   |   |   |     |     |     |   |   |   |     |  |
| mFOXO1 | 352 | --MASTLPSLSEISNPE-----              | N     | MENLLD     | NLNLLS | S       | P        | TSLT  | TVSTQ         | S                 | P   | GS | M | MQ | T   | P | 400 |   |   |   |   |   |   |   |   |   |   |   |   |   |   |   |       |   |   |      |   |   |   |     |     |     |   |   |   |     |  |
| hFOXO1 | 355 | --MASTLPSLSEISNPE-----              | N     | MENLLD     | NLNLLS | S       | P        | TSLT  | TVSTQ         | S                 | P   | GS | M | MQ | T   | P | 403 |   |   |   |   |   |   |   |   |   |   |   |   |   |   |   |       |   |   |      |   |   |   |     |     |     |   |   |   |     |  |
| hFOXO3 | 360 | KPCTVELPRLTDMAGTMNLDGLTENLMDDLLDNIT | ----- | LPP        | SQ     | S       | P        | T     | GG            | M                 | Q   | R  | S | S  | 412 |   |     |   |   |   |   |   |   |   |   |   |   |   |   |   |   |   |       |   |   |      |   |   |   |     |     |     |   |   |   |     |  |
|        |     | : * :                               |       | :          | :      | :       | :        | :     | :             | :                 | :   | :  | : | :  | :   | : |     |   |   |   |   |   |   |   |   |   |   |   |   |   |   |   |       |   |   |      |   |   |   |     |     |     |   |   |   |     |  |
|        |     |                                     |       |            |        |         |          |       |               |                   |     |    |   |    |     |   |     |   |   |   |   |   |   |   |   |   |   |   |   |   |   |   |       |   |   |      |   |   |   |     |     |     |   |   |   |     |  |
| DAF-16 | 378 | SKPIK---TEPIA                       | P     | P          | P      | SY      | HELNS    | VRG   | S             | CAQ               | N   | P  | L | L  | R   | N | P   | I | V | P | S | T | N | F | K | P | M | P | L | G | A | Y | G     | N | Y | Q    | N | G | G | 434 |     |     |   |   |   |     |  |
| mFOXO1 | 401 | CYSFAPPNTSLNS                       | S     | P          | S      | P       | NY       | S     | K--           | Y                 | T   | Y  | Q | S  | S   | M | S   | P | L | P | Q | M | P | M | Q | T | L | Q | D | S | K | S | ----- | Y | G | L    | N | Q | Y | N   | 453 |     |   |   |   |     |  |
| hFOXO1 | 404 | CYSFAPPNTSLNS                       | S     | P          | S      | P       | NY       | Q     | --            | Y                 | T   | Y  | Q | S  | S   | M | S   | P | L | P | Q | M | P | I | Q | T | L | Q | D | N | K | S | ----- | Y | G | G    | M | S | Q | Y   | N   | 456 |   |   |   |     |  |
| hFOXO3 | 413 | SFPYTTKGSGLG                        | S     | P          | T      | S       | S        | F     | N             | --                | T   | V  | F | G  | P   | S | S   | L | N | S | L | R | Q | S | P | M | Q | T | I | Q | E | N | K     | P | A | ---- | T | F | S | S   | M   | S   | H | Y | G | 466 |  |
|        |     | .                                   | :     | :          | :      | *       | :        | :     | .             | .                 | .   | *  | : | :  | .   | * | :   | : | : | * | : | * | : | * | : | * | : | * | : | : | : | : | :     | : | : | :    | : | : | : | :   | :   | :   | : | : | : | :   |  |

**Supplementary Figure 1. NLK-sites in FOXO-proteins.** ClustalΩ alignment of full-length DAF-16 with murine and human FOXO1 and human FOXO3. Only the part covering the 8 NLK-sites reported in murine FOXO1 is shown [6]. The Ser/Thr-residues phosphorylated by NLK are highlighted in blue, the obligatory Pro immediately following an NLK-phosphorylated Ser/Thr is highlighted in yellow. The only SP-site in this region that is conserved between DAF-16 and murine/human FOXO1s is Ser326/Ser326/Ser329. Note: NLK-phosphorylation of individual residues has been reported to be weak [6].

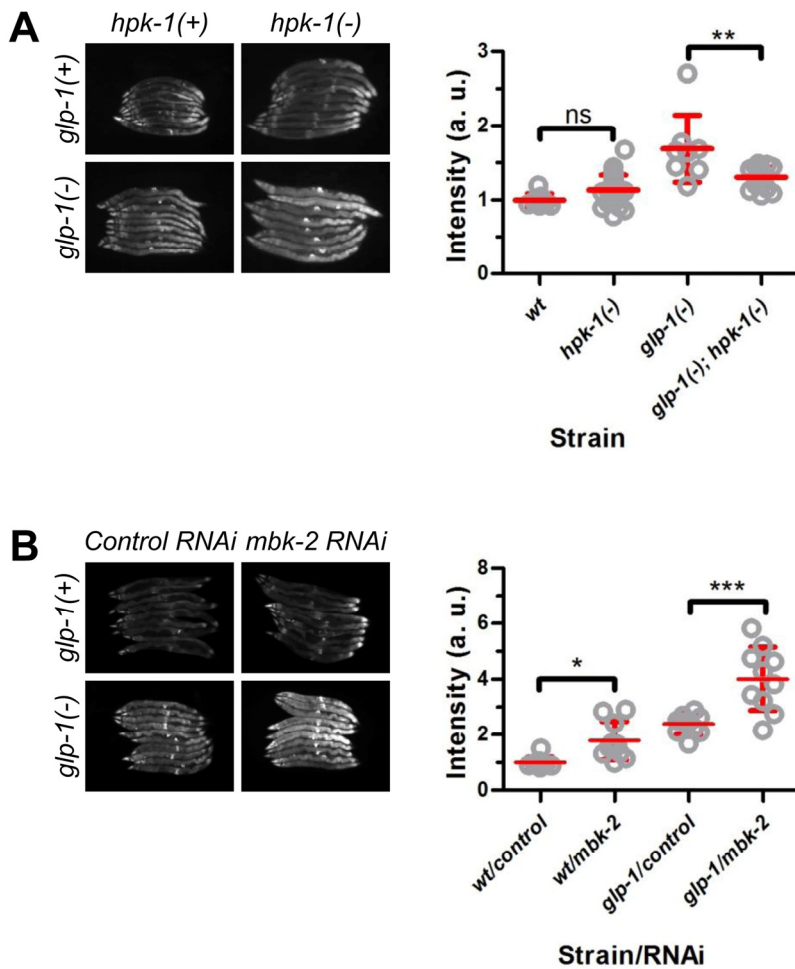

**Supplementary Figure 2. Effect of DYRK-family kinases HPK-1 and MBK-2 on *Psod-3::gfp* expression.** Accompanies Figure 3. (A) The *hpk-1* loss of function mutation *hpk-1(pk1393)* decreases *Psod-3::gfp*-expression in germline-deficient *glp-1(-)* [*glp-1(e2144ts)*], but not in wild-type animals (representative experiment shown, n=5). (B) Depletion of *mbk-2* by RNAi increases *Psod-3::gfp*-expression in *glp-1(-)*, and –to a lesser extent– in wild-type background. RNAi treatment was initiated at the L1 stage (representative experiment shown, n=3). Error bars indicate standard deviations. Statistical significance of fluorescence intensity differences was determined by two-way ANOVA with Bonferroni post tests. All experiments in (A) and (B) were performed on day-2 adult worms. Images were taken at 100x magnification.

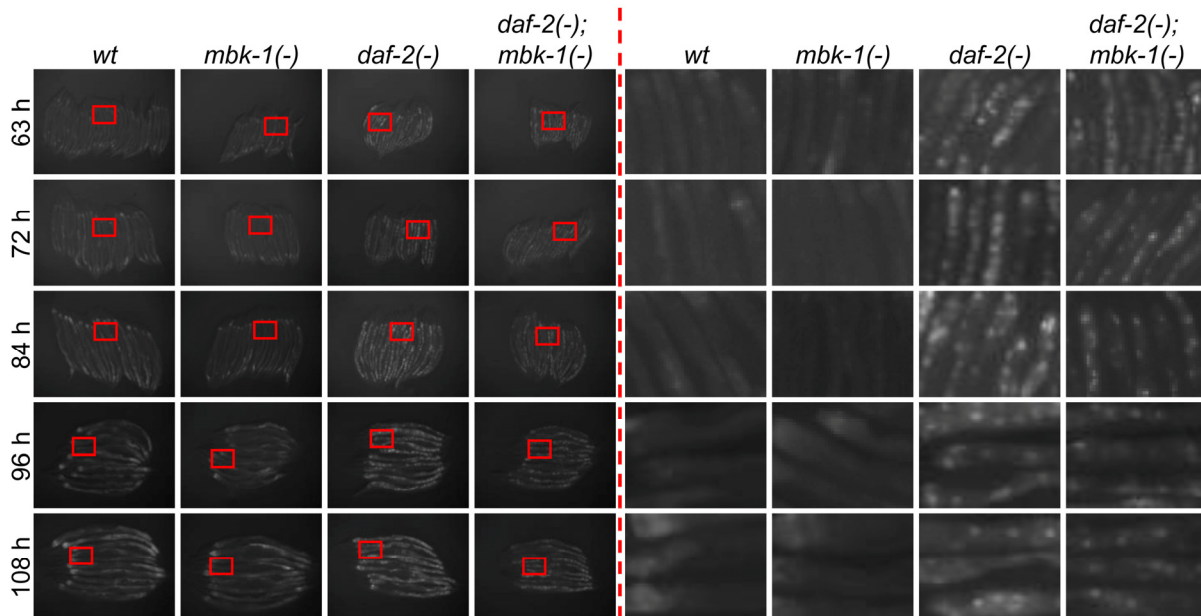

**Supplementary Figure 3. Loss of *mbk-1* does not affect DAF-16 subcellular localization in *daf-2* mutant *C. elegans*.** Accompanies Figure 4. The effect of the *mbk-1* loss of function mutation *mbk-1(pk1389)* on subcellular localization of an intestine-specific GFP::*DAF-16* protein (encoded by transgene *muls145[Pges-1::gfp::daf-16]*) was determined at the times indicated in wild-type and *daf-2(-)* [*daf-2(e1370)*] animals. Images on the left were taken at 100x magnification, images on the right are 6.5x magnifications of the areas boxed in red.
